# Using population-specific add-on polymorphisms to improve genotype imputation in underrepresented populations

Zhi Ming Xu<sup>1,2</sup>, Sina Rüeger<sup>1,2</sup>, Michaela Zwyrer<sup>3,4</sup>, Daniela Brites<sup>3,4</sup>, Hellen Hiza<sup>3,4,5</sup>, Miriam Reinhard<sup>3,4</sup>, Sonia Borrell<sup>3,4</sup>, Faima Isihaka<sup>5</sup>, Hosiana Temba<sup>5</sup>, Thomas Maroa<sup>5</sup>, Rastard Naftari<sup>5</sup>, Jerry Hella<sup>5</sup>, Mohamed Sasamalo<sup>5</sup>, Klaus Reither<sup>3,4</sup>, Damien Portevin<sup>3,4</sup>, Sebastien Gagneux<sup>3,4</sup>, Jacques Fellay<sup>1,2,6,\*</sup>

<sup>1</sup>*School of Life Sciences, École Polytechnique Fédérale de Lausanne, Lausanne, Switzerland*

<sup>2</sup>*Swiss Institute of Bioinformatics, Lausanne, Switzerland*

<sup>3</sup>*Swiss Tropical and Public Health Institute, Basel, Switzerland*

<sup>4</sup>*University of Basel, Basel, Switzerland*

<sup>5</sup>*Ifakara Health Institute, Dar es Salaam, Tanzania*

<sup>6</sup>*Precision Medicine Unit, Lausanne University Hospital and University of Lausanne, Lausanne, Switzerland*

---

## Abstract

Genome-wide association studies rely on the statistical inference of untyped variants, called imputation, to increase the coverage of genotyping arrays. However, the results are often suboptimal in populations underrepresented in existing reference panels and array designs, since the selected single nucleotide polymorphisms (SNPs) may fail to capture population-specific haplotype structures, hence the full extent of common genetic variation. Here, we propose to sequence the full genome of a small subset of an underrepresented study cohort to inform the selection of population-specific add-on SNPs, such that the remaining array-genotyped cohort could be more accurately imputed. Using a Tanzania-based cohort as a proof-of-concept, we demonstrate the validity of our approach by showing improvements in imputation accuracy after the addition of our designed add-on SNPs to the base H3Africa array.

**Keywords:** Genotyping; Imputation; Reference Panels; GWAS ; Tanzania

---



---

\*Corresponding author

Email address: [jacques.fellay@epfl.ch](mailto:jacques.fellay@epfl.ch) (Jacques Fellay)

# 1. Introduction

By mapping the associations between single-nucleotide polymorphisms (SNPs) and various phenotypes, genome-wide association studies (GWAS) have allowed us to gain unprecedented knowledge on the genetic basis of various human diseases and traits. An important prerequisite to conducting GWAS is the availability of a cost-effective yet accurate high-throughput genotyping method. Genotyping arrays have been used widely over the past 15 years, including in many studies facilitated by biobank resources such as the UK Biobank[1]. However, genotyping arrays rely on the imputation of a sparse set of tag SNPs (e.g. millions of SNPs) to achieve acceptable density genome-wide (e.g. tens of millions of SNPs). The quality of imputation is dependent on the suitability of the tag SNPs and the similarity of haplotype structure between the reference panel and the study population[2, 3, 4, 5].

For study populations where a genetically similar reference panel or population-specific array content may not be available, whole-genome sequencing (WGS) offers an alternative to genotyping arrays. Previous studies have suggested that WGS may offer substantial gains in such a scenario, potentially pinpointing loci absent in GWAS conducted using genotyping arrays [6, 7]. However, due to the large sample sizes often required to gain sufficient statistical power in GWAS, the cost of WGS can still be prohibitive despite its recent decrease [8].

An alternative to WGS is the development of population-specific reference panels and genotyping arrays. For example, African-specific reference panels and genotyping arrays have been developed in recent years in an attempt to rectify the underrepresentation of African populations in genetic studies[9, 10, 11]. Notably, the Human Heredity and Health in Africa (H3Africa) consortium has developed the H3Africa genotyping array, which contains approximately 2.2 million tags, to capture genetic variability observed in various African populations [12]. Furthermore, the African Genome Resource (AFGR) reference panel has been designed to capture the haplotype structure of various African populations to improve imputation accuracy. However, driven by the long evolutionary history and

29 lack of bottlenecks, the level of genetic diversity is much higher among African populations  
30 compared to non-African populations [13, 14]. Therefore, these resources have not yet  
31 been able to provide complete coverage of genetic variation across all African populations.  
32 For the remaining underrepresented populations, we propose the use of add-on SNPs as  
33 a cost-effective approach to improve genotype imputation.

34 In this paper, we present an approach to select population-specific add-on SNPs that  
35 supplement commercially available genotyping arrays. For a GWAS cohort, we propose  
36 to perform WGS in a small subset (e.g. 10% of the entire cohort), in order to supplement  
37 existing reference panels but also to inform the selection of the add-on content, such that  
38 the rest of the array-genotyped cohort could be more accurately imputed. Specifically,  
39 the WGS data could reveal population-specific allele frequency differences (Figure 1A and  
40 Figure 1B) and haplotype structure differences (Figure 1C). Such information enables the  
41 selection of add-on tag SNPs designed for the study population, such that the imputation  
42 of target SNPs that are poorly tagged by existing tag SNPs could be improved.

43 As a proof-of-concept example, we utilize 116 high coverage WGS samples from partic-  
44 ipants of the TB-DAR cohort (Tuberculosis patients recruited in a hospital in Dar es  
45 Salaam, Tanzania). Since the Tanzanian population is not incorporated in existing ref-  
46 erence panels and array designs, including the AFGR reference panel and the H3Africa  
47 genotyping array, this cohort provides an ideal basis to evaluate our approach. We first  
48 illustrate the necessity for add-on SNPs by calculating the genetic differentiation between  
49 our Tanzanian cohort and other African populations. We proceed to select add-on SNPs  
50 that target common variants that are poorly imputed under the base H3Africa array. We  
51 then confirm the validity of our approach by evaluating the improvement in imputation  
52 accuracy enabled by the addition of add-on SNPs. Finally, we present an alternative  
53 selection scheme for mitochondrial and Y chromosome variants to improve haplogroup  
54 calling.

## 55 2. Material and Methods

### 56 2.1. Study description

57 This study was conducted based on a cohort of adult pulmonary tuberculosis (TB)  
58 patients from Dar es Salaam, Tanzania (TB-DAR). Participants were recruited at the  
59 Temeke Regional Hospital in Dar es Salaam. 128 patients were randomly selected from the  
60 cohort for WGS, and 116 samples which passed sequencing quality control were retained.  
61 Ethnic information of patients are based on self-reported information.

### 62 2.2. Whole genome sequencing and quality control

63 WGS was performed at the Health2030 Genome Center in Geneva on the Illumina  
64 NovaSeq 6000 instrument (Illumina Inc, San Diego CA, USA), starting from 1 µg of whole  
65 blood genomic DNA and using Illumina TruSeq DNA PCR-Free reagents for library  
66 preparation and the 150nt paired-end sequencing configuration. Average coverage was  
67 above 30× for 75 samples, between 10× and 30× for 40 samples, and approximately 8×  
68 for a single sample.

69 Sequencing reads were aligned to the GRCh38 (GCA\_000001405.15) reference genome  
70 using bwa[15] (Version 0.7.17), and duplicates marked using Picard (Version 2.8.14, <http://broadinstitute.github.io/picard/>). Following the GATK best practices (Germline  
71 short variant discovery)[16], Base Quality Score Re-calibration (BQSR) was applied using  
72 the GATK package[17] (Version 4.0.9.0). Variants were called individually per sample  
73 and then jointly. A Variant Quality Score Re-calibration (VQSR) based filter was then  
74 applied, with a truth sensitivity threshold of 99.7 and an excess heterozygosity threshold  
75 of 54.69. Samples with a high genotype missingness rate ( $> 0.5$ ) were excluded.  
76

77 To ensure that coordinates of the TB-DAR WGS data matched the GRCh37 based  
78 AFGR reference panel, a liftover was applied using Picard LiftoverVcf with the UCSC  
79 chain file (hg38ToHg19). Only SNPs that were successfully lifted over to the same chromo-  
80 some were retained. Within the X and Y chromosomes, SNPs within the pseudoautosomal  
81 regions[18, 19] were excluded.

### 82 2.3. Fixation index and genetic principal components

83 Relatedness between individuals within the TB-DAR WGS cohort and each African  
84 population of the 1000 Genomes project was calculated using KING[20]. Pairs up to first  
85 degree relatives were excluded.

86 To conduct principal component analysis (PCA), only autosomal SNPs that were  
87 genotyped in both 1000 Genomes and TB-DAR WGS cohorts were included. SNPs within  
88 long-range LD regions[21] were excluded. Using PLINK (Version 1.9)[22], LD pruning [23]  
89 (`plink --indep-pairwise 1000 50 0.05`) was applied and principal components were  
90 derived based on the merged cohorts (TB-DAR and all 1000 Genomes super-populations  
91 or TB-DAR and all 1000 Genomes African populations). To measure differentiation  
92 between the TB-DAR WGS cohort and various 1000 Genomes African populations, the  
93 fixation index ( $F_{ST}$ ) for each SNP was calculated using vcftools (v0.1.13)[24] according to  
94 Weir and Cockerham’s formulation [25]. Only autosomal SNPs that were genotyped and  
95 common ( $MAF > 0.05$ ) in the merged cohort (TB-DAR and all 1000 Genomes African  
96 populations) were included. The reported genome-wide  $F_{ST}$  measures were defined as  
97 the mean across the SNP-based  $F_{ST}$  for all considered SNPs.

98 To estimate differentiation within a population, each population was divided into  
99 halves based on the median of the top genetic principal components.  $F_{ST}$  was calculated  
100 between the two halves. Since the top genetic principal component explains the most  
101 proportion of genetic variability, this approach is expected to yield the two equally sized  
102 sub-populations that are the most differentiated within a population.

### 103 2.4. Selection of add-on SNPs

104 Our approach to select add-on SNPs can be divided into three main steps. In step  
105 1, genotype imputation was performed. Poorly imputed SNPs were identified, and act  
106 as candidate target SNPs which our add-on tags would be designed to tag. In step 2,  
107 the optimal add-on tag SNPs were selected based on the population-specific LD structure  
108 and allele frequencies of the study cohort. In step 3, we evaluated the improvement in

109 imputation performance when the selected add-on SNPs were incorporated onto the base  
110 H3Africa array. A summary of the approach can be found in Figure 2.

#### 111 *2.4.1. Step 1: Genotype imputation and identification of candidate target SNPs*

112 The TB-DAR WGS cohort was divided into a training set (3/4 of the data) and a  
113 testing set (1/4 of the data).

114 To achieve optimal imputation accuracy, two reference panels were used to capture  
115 haplotype structures present in both the Tanzanian population and in other African  
116 populations. A custom Tanzanian reference panel based on the TB-DAR WGS train-  
117 ing set samples was constructed using Minimac3[26]. The African Genome Resources  
118 (AFGR) reference panel (Web Resources) hosted on the Sanger imputation service (Web  
119 Resources)[27] was also utilized, where EAGLE2[28] was used for phasing and the posi-  
120 tional Burrows-Wheeler transform (PBWT)[29] was used for imputation.

121 To identify poorly imputed SNPs expected under the H3Africa array content (Version  
122 2, Web Resources), the TB-DAR WGS testing set was masked such that only SNPs  
123 present on the H3Africa array were retained. The masked data was imputed using both  
124 reference panels, and for each SNP the imputation was based on the reference panel  
125 that yielded a better imputation score. Candidate target SNPs were designated as SNPs  
126 that are poorly imputed ( $\text{INFO} < 0.8$ ) but common in the TB-DAR WGS cohort ( $\text{MAF}$   
127  $> 0.05$ ).

#### 128 *2.4.2. Step 2: Add-on tag SNP selection*

129 For each region, the set of candidate target SNPs ( $S_1$ ) was defined as SNPs that are  
130 poorly imputed but common (See Section 2.4.1). The set of candidate add-on tag SNPs  
131 ( $S_2$ ) was defined as sequenced SNPs that are common ( $\text{MAF} > 0.05$ ), part of the AFGR  
132 Reference Panel or the TB-DAR reference panel, and available as Illumina Infinium probes  
133 (probe-ability score  $> 0.3$ ). The set of existing tags ( $S_3$ ) was initialized as SNPs that  
134 are part of the H3Africa array.

135 LD information between SNPs were calculated based on TB-DAR WGS training set.

136 We utilized mutual information (MI) as a LD metric (See Supplemental Methods), con-  
137 sistent with the choice of a previous array design study for the Japanese population [30].

138 To select the optimal set of add-on SNPs, we followed the framework of a forward-  
139 selection based algorithm [30]. In summary, the algorithm select tags that are in the  
140 strongest LD with the highest number of candidate target SNPs not captured by existing  
141 tags.

142 For a single iteration of the add-on tag SNP selection algorithm:

1. For a candidate target SNP ( $j$ ), the existing tag SNP that is in strongest LD with  
it was identified. The MI score of the target SNP ( $s_j$ ) was defined as:

$$s_j = \max_{i \in S_3} I_{ij}$$

143 where  $I_{ij}$  denotes the MI between SNP  $i$  and SNP  $j$ .

2. For each pair of candidate add-on tag SNP ( $k$ ) and candidate target SNP ( $j$ ), the  
add-on tag's efficiency was defined as the expected change in MI ( $\delta_{jk}$ ) resulting  
from the incorporation of the add-on tag:

$$\delta_{jk} = I_{jk} - s_j$$

3. The efficiency of a candidate add-on tag SNP ( $e_k$ ) against all candidate target SNPs  
was defined based on the sum of the changes in MI:

$$e_k = \frac{\sum_{j \in S_1} \max(0, \delta_{jk})}{N_k}$$

144 where  $N_k$  denotes the number of probes required for the  $k^{th}$  candidate add-on tag  
145 (2 for A/T or C/G SNPs, and 1 for all others).

4. The optimal add-on tag SNP ( $k^*$ ) was identified based on the overall rank of its

efficiency and probe-ability scores:

$$k^* = \operatorname{argmin}_{k \in S_2} r_{e_k} + r_{p_k}$$

where  $r_{e_k}$  and  $r_{p_k}$  denotes the ranking of the efficiency score and probe-ability score respectively for the candidate add-on tag  $k$ .

5.  $k^*$  was added to the set of existing tags ( $S_3$ ), and the above steps were repeated. The selection procedure was stopped when there are no candidate add-on tags remaining ( $S_2$  becomes empty), or when the stopping criteria were met.

Figure S1 illustrates an example of a single iteration of the add-on tag SNP selection algorithm.

### 2.4.3. Step 2: Region definitions and stopping criteria

To ensure the efficiency of add-on tag SNP selection but simultaneously guarantee sufficient coverage in prioritized regions, a two-step procedure for tag SNP selection with unique region definitions and stopping criteria was established.

Under Setting 1, regions spanning 5000 base pairs upstream and downstream of genes or SNPs associated with TB outcomes (reported by GWAS catalog [31], Open Targets[32], and other GWAS studies[33, 34, 35]) were considered. The killer cell immunoglobulin-like receptor (KIR) and human leukocyte antigen (HLA) gene regions were also considered. A region was subject to add-on tag SNP selection if it contained a substantial number of poorly imputed common SNPs, defined as more than 20% of SNPs with INFO < 0.8. Regions were also subjected to add-on tag SNP selection if it contained an uneven spatial distribution of well imputed common SNPs, defined as the spread of poorly imputed SNPs (INFO < 0.8) being more than 1.25 times the spread of well-imputed SNPs (INFO ≥ 0.8). To guarantee sufficient coverage, iterations of the forward-selection algorithm was run for each region independently until less than 0.5% of candidate target SNPs within the region showed  $\delta_k$  improvements. The process was then repeated for each of the prioritized regions.



Under Setting 2, the selection of add-on tag SNPs was expanded to any region across the genome that contained poorly imputed common SNPs. The regions were defined as either a haplotype block (`plink --blocks`)[36, 22] or a region spanning 5000 base pairs upstream and downstream a candidate target SNP, whichever larger. To maximize the selected add-on tag SNPs' tagging efficiencies, a single iteration of the algorithm was run concurrently across all regions. The tag SNP that scored the best across all regions was incorporated. The process was then repeated until the total number of budgeted add-on probes (N=5000) has been exhausted.

#### 2.4.4. Step 3: Evaluation of imputation accuracy

The TB-DAR WGS testing set was utilized to measure improvements in imputation performance enabled by the add-on tag SNPs. For all target SNPs tagged by at least one add-on SNP, imputation quality (INFO score) derived from the base H3Africa array was compared against imputation quality derived from the H3Africa array with the addition of add-on tags. In addition, to measure the accuracy of the imputed genotypes, squared Pearson correlation coefficients ( $r^2$ ) was calculated between the imputed genotype dosages (0,1 or 2) and the ground truth dosages based on the WGS data.

#### 2.5. Y Chromosome and Mitochondrial Haplogroups

The haplogroups of TB-DAR participants were called using HaploGrep2[37] and yhaplo[38] for the mitochondria and the Y chromosome respectively. The Phylotree mitochondrial[39] and Y chromosome[40] phylogeny databases were used to identify marker SNPs. Marker SNPs for each main haplogroup that any TB-DAR participant was part of were included as add-on SNPs, if not already existing on the H3Africa array. In addition, we added maker SNPs 2 branch points below the main haplogroup that any TB-DAR participant was part of.

### 194 3. Results

#### 195 3.1. Differentiation between the Tanzanian population and other African populations

196 Study participants of the TB-DAR WGS cohort originated from various ethnic groups  
197 within Tanzania (Table S1). A majority of participants belonged to the Bantu-speaking  
198 ethnic groups ( $N = 108$ , 93.1%), with a small minority that belonged to the Nilotic  
199 ( $N = 1$ , 0.8%) and Cushitic ( $N = 3$ , 2.6%) speaking ethnic groups. Self-reported ethnic  
200 information was not available for four participants.

201 To quantify the population differentiation between the TB-DAR WGS cohort and the  
202 1000 Genomes African populations, for each pair of populations we calculated the genome-  
203 wide fixation index ( $F_{ST}$ ). Figure 3A illustrate the pairwise  $F_{ST}$  measures between the  
204 TB-DAR WGS cohort and 1000 Genomes African population, along with their respective  
205 sampling locations. In general, genetic differentiation was greater between populations  
206 that are further away geographically. For example, TB-DAR displayed the least differen-  
207 tiation with the Bantu-speaking Luhya population (LWK) in neighbouring Kenya, but the  
208 most differentiation with West African populations such as the Gambian in the Western  
209 Division of Gambia (GWD) and the Mende in Sierra Leone (MSL). A similar pattern was  
210 observed among 1000 Genomes African populations (Figure 3B), where population pairs  
211 in the same geographic region (e.g., YRI and ESN) were among the least differentiated  
212 population pairs. In addition, the genetic principal components (PCs) shown in Figure  
213 S2 also illustrate a similar pattern, where distances in PC space approximately scaled  
214 with geographic distances between the sampling locations of populations.

215 To further evaluate the significance of differentiation between populations, we com-  
216 pared the inter-population  $F_{ST}$  against the within-population  $F_{ST}$ . The within-population  
217  $F_{ST}$  was calculated between two halves of each population that are expected to be the  
218 most differentiated, defined based on the median of the top genetic principal component.  
219 The diagonal of Figure 3B represent within-population  $F_{ST}$  measures. For every popu-  
220 lation, the within-population  $F_{ST}$  was lower than the inter-population  $F_{ST}$  against the  
221 population which it is the least differentiated from. For example, the within-population

222  $F_{ST}$  of the TB-DAR WGS cohort (0.001) is lower than the inter-population  $F_{ST}$  against  
223 the LWK population (0.003).

224 These results quantify the genetic diversity of populations within Africa, and illustrate  
225 the differentiation between the TB-DAR cohort and African populations of the 1000  
226 Genomes project. Thus, the need to supplement external reference panels with Tanzanian  
227 specific haplotypes and to design population-specific add-ons for the TB-DAR cohort is  
228 warranted.

### 229 *3.2. Selection of add-on SNPs and improvements in imputation accuracy*

230 The selection of add-on SNPs was conducted under two different settings (Section  
231 2.4.3). Under a coverage-guaranteeing setting (Setting 1), we selected 1669 add-on SNPs  
232 within 337 prioritized TB-associated regions. In addition, under an efficiency-driven  
233 setting (Setting 2), we selected 2734 further add-on SNPs across the rest of the genome.  
234 Figure S3 shows the distribution of all selected SNPs across chromosomes.

235 To confirm the validity of our approach, we used the TB-DAR WGS testing set to  
236 compare the imputation accuracy based on the base H3Africa array against the improved  
237 H3Africa array with our add-on content. Figure 4A shows the mean imputation quality  
238 of target SNPs that our add-on SNPs were designed to tag across different minor allele  
239 frequency (MAF) percentile bins. Under both settings, we observed strong overall im-  
240 provement across MAF bins in imputation accuracy with the incorporation of add-on  
241 tag SNPs, reflected by the increase in mean INFO score and  $r^2$  (correlation with WGS  
242 ground truth). While the magnitude of increase in mean imputation accuracy was similar  
243 for both settings, in general, target SNPs in prioritized regions were better imputed. This  
244 was as intended since, under Setting 1, even relatively well-imputed SNPs within each  
245 region would be tagged by add-on SNPs in order to guarantee coverage.

246 An example region where our approach functioned as expected is shown in Figure  
247 4B. Our designed add-on SNPs lead to improved imputation of target SNPs, reflected by  
248 increases in both INFO score and  $r^2$ . Noticeably, add-on SNPs were mainly located in  
249 proximity to the previously poorly imputed target SNPs (left side of the region). This

indicates, as designed, that only add-on SNPs that are in relatively strong LD with target SNPs were selected, as LD generally scales inversely with distance.

To quantify the efficiency of the selected add-on SNPs, Table 1 shows the number of targeted SNPs with INFO score improvements. Under an INFO score threshold of 0.8 (commonly used in GWAS), our 4403 add-on SNPs would allow the incorporation of an additional 10,349 and 38,336 target SNPs in GWAS, in TB associated regions (Setting 1) and all other regions (Setting 2) respectively. This translates to the addition of approximately 6 and 14 target SNPs per add-on SNP, under Setting 1 and Setting 2 respectively. As expected, the number of successfully tagged target SNPs per add-on SNP is lower under Setting 1. This is because to guarantee coverage, relatively short haplotypes are tagged, resulting in the reduced efficiency of each add-on tag SNP.

### 3.3. Mitochondria and Y chromosome haplogroups

Since mitochondrial and Y chromosome haplogroups provide an efficient manner to track human evolutionary history, we targeted haplogroup markers to improve the accuracy of haplogroup calling. The distribution of mitochondrial and Y chromosome haplogroups within the TB-DAR WGS cohort are shown in Figure S4A and Figure S4B respectively. With regards to the mitochondrial DNA, most individuals belonged to the L haplogroup. This was consistent with findings based on the 1000 Genomes project[41], where the L haplogroups were found to be the dominant haplogroups in African populations. For the Y chromosome, a majority of male individuals belonged to the E haplogroups, with a small minority belonging to the B, R, and others. This was also consistent with the 1000 Genomes project[42], where the E haplogroups were found to be dominant in African populations. Also in the Luhya population in neighbouring Kenya a small minority belonged to the B haplogroup[42].

To ensure that our add-on content includes haplogroup markers that complement the existing content on the H3Africa array, we selected 103 and 31 haplogroup marker SNPs as add-ons for the mitochondria and Y chromosome respectively. For the mitochondria, we saw an average improvement in haplogroup calling of 22% compared to the H3Africa array.

278 For the Y chromosome, due to the limited number of add-on SNPs and sufficient coverage  
279 by the H3Africa array, we did not observe any significant differences in haplogroup calling.

## 280 4. Discussion

281 The strategy to supplement external reference panels with WGS samples from an  
282 internal study cohort has been employed by previous studies[43, 44]. Specifically, it has  
283 been shown that the addition of even a relatively small number of samples from the  
284 internal cohort leads to improved imputation accuracy, especially if the study population  
285 is genetically dissimilar from the populations captured by existing reference panels[45, 6].  
286 Our work confirms the utility of including population-specific haplotypes in the reference  
287 panel used for imputation, but it also shows that the use of add-on SNPs further improves  
288 imputation accuracy of common variants in the study population.

289 Our add-on tag SNP selection procedure did not explicitly target population-specific  
290 SNPs, such as ancestry informative markers[46, 47], but rather targeted any SNP observed  
291 in our study population that are expected to be poorly imputed under the existing base  
292 array content. Such a choice was driven by the aim of GWAS, which is to map any SNP  
293 associated with the trait of interest, which may not necessarily be population-specific.  
294 Nevertheless, we did apply an allele frequency based (MAF) cutoff to ensure that only  
295 SNPs polymorphic in the study population were targeted. As a result, a substantial  
296 fraction of the targeted SNPs were successfully imputed based on the TB-DAR reference  
297 panel (Table 1). This suggested that our add-on SNPs were able to tag population-specific  
298 haplotype structures, which contributed to improved imputation accuracy.

299 An add-on tag SNP that most efficiently tags a target SNP (in the strongest LD)  
300 may not necessarily be the optimal tag, as the genotyping error rate of the probe for the  
301 particular SNP may be high. To rectify such issue, we limited our selection to add-on  
302 tags SNPs with probes that have high success rates (Illumina probe-ability score  $> 0.3$ ),  
303 and weighted the trade-off between LD strength and probe quality equally when selecting  
304 the optimal add-ons. Nevertheless, a more complex weighting scheme may result in even

305 better performance.

306 We introduced two settings for the selection of add-on SNPs, namely either coverage-  
307 guaranteeing (Setting 1) or efficiency-driven (Setting 2). For users of our approach, the  
308 number of regions assigned to each setting could be adjusted depending on the study.  
309 For example, if there exists strong prior knowledge with regards to genes implicated in  
310 or loci associated with the trait of interest, these regions could be assigned to Setting  
311 1. Conversely, for traits with a lack of prior knowledge, a greater proportion of regions  
312 could be assigned to Setting 2, such that tag selection would be conducted in a more  
313 hypothesis-free manner.

314 A limitation of our approach is that only common SNPs ( $MAF > 0.05$ ) were targeted  
315 by the selected add-on SNPs. Such a choice was made due to the limited sample size of  
316 our WGS cohort, where for rarer target SNPs there would be insufficient observations to  
317 estimate LD. Nevertheless, the imputation accuracy of rarer SNPs (for example,  $0.01 <$   
318  $MAF < 0.05$ ) which are in strong LD with the targeted SNPs could still increase if tested  
319 in a larger testing set.

320 In conclusion, in order to improve imputation accuracy in populations underrepre-  
321 sented in existing reference panels and genotyping array designs, we propose a framework  
322 where a subset of a cohort is sequenced and the rest genotyped using an array supple-  
323 mented with the selected add-on SNPs. Using a Tanzanian-based cohort as a proof-of-  
324 concept, we demonstrated that under our approach, the WGS data could be leveraged  
325 to supplement existing reference panels and to select add-on SNPs, such that imputa-  
326 tion accuracy is improved. Our approach is generalizable to any other population to  
327 improve genotype imputation, and thus provides a cost-effective solution to increase the  
328 power of GWAS in a diverse range of underrepresented populations and to further our  
329 understanding of human genetic diversity.

## Supplemental Data

Supplemental Data include 5 figures and 1 table.

## Declaration of Interests

The authors declare no competing interests.

## Ethics Approval and Consent

Ethical approval for the TB-DAR cohort has been obtained from the Ethikkommission Nordwest- und Zentralschweiz, the Ifakara Health Institute and the National Institute for Medical Research in Tanzania. An informed consent has been obtained from every patient who has been recruited into the TB-DAR cohort. This consent includes the use of the patient's blood for human genomic analyses.

## Acknowledgments

This work was supported by the Swiss National Science Foundation (Sinergia Grant: 177163). We thank the study participants of the TB-DAR study for their contribution. We thank K. Harshman, I. Bartha, C. Howald, and D. Lamparter (Health 2030 Genome Center, Geneva, Switzerland) for sequencing support. We thank C. Thorball, K. Popadin, D. Lawless, O. Naret, and F. Hodel for helpful discussion.

## Data and Code Availability

Software code and a list of add-on SNPs designed for the TB-DAR cohort is available at: <https://github.com/zmx21/h3africa-addon>

## Web Resources

Open Targets: <https://www.targetvalidation.org/>  
 GWAS Catalog: <https://www.ebi.ac.uk/gwas/>  
 Sanger Imputation Service: <https://imputation.sanger.ac.uk/>  
 AFGR Reference Panel: <https://imputation.sanger.ac.uk/?about=1#referencepanels>  
 H3Africa Genotyping Array: <https://chipinfo.h3abionet.org/help>

## References

- [1] Bycroft, C., Freeman, C., Petkova, D., Band, G., Elliott, L. T., Sharp, K., Motyer, A., Vukcevic, D., Delaneau, O., O'Connell, J. *et al.* (2018). The UK biobank resource with deep phenotyping and genomic data. *Nature* 562, 203–209.
- [2] Kowalski, M. H., Qian, H., Hou, Z., Rosen, J. D., Tapia, A. L., Shan, Y., Jain, D., Argos, M., Arnett, D. K., Avery, C. *et al.* (2019). Use of >100, 000 NHLBI trans-omics for precision medicine (TOPMed) consortium whole genome sequences improves imputation quality and detection of rare variant associations in admixed african and hispanic/latino populations. *PLOS Genetics* 15, e1008500.

- [3] Hou, L., Kember, R. L., Roach, J. C., O’Connell, J. R., Craig, D. W., Bucan, M., Scott, W. K., Pericak-Vance, M., Haines, J. L., Crawford, M. H. *et al.* (2017). A population-specific reference panel empowers genetic studies of anabaptist populations. *Scientific Reports* 7.
- [4] Lin, M., Caberto, C., Wan, P., Li, Y., Lum-Jones, A., Tiirikainen, M., Pooler, L., Nakamura, B., Sheng, X., Porcel, J. *et al.* (2020). Population-specific reference panels are crucial for genetic analyses: an example of the CREBRF locus in native hawaiians. *Human Molecular Genetics* 29, 2275–2284.
- [5] Schurz, H., Müller, S. J., van Helden, P. D., Tromp, G., Hoal, E. G., Kinnear, C. J., and Möller, M. (2019). Evaluating the accuracy of imputation methods in a five-way admixed population. *Frontiers in Genetics* 10.
- [6] Sidore, C., Busonero, F., Maschio, A., Porcu, E., Naitza, S., Zoledziewska, M., Mulas, A., Pistis, G., Steri, M., Danjou, F. *et al.* (2015). Genome sequencing elucidates sardinian genetic architecture and augments association analyses for lipid and blood inflammatory markers. *Nature Genetics* 47, 1272–1281.
- [7] Höglund, J., Rafati, N., Rask-Andersen, M., Enroth, S., Karlsson, T., Ek, W. E., and Johansson, Å. (2019). Improved power and precision with whole genome sequencing data in genome-wide association studies of inflammatory biomarkers. *Scientific Reports* 9.
- [8] NHGRI (2020). The cost of sequencing a human genome. /<https://www.genome.gov/about-genomics/fact-sheets/Sequencing-Human-Genome-cost>, Last accessed on 2020-09-11.
- [9] Popejoy, A. B. and Fullerton, S. M. (2016). Genomics is failing on diversity. *Nature* 538, 161–164.
- [10] Bentley, A. R., Callier, S. L., and Rotimi, C. N. (2020). Evaluating the promise of inclusion of african ancestry populations in genomics. *npj Genomic Medicine* 5.
- [11] Need, A. C. and Goldstein, D. B. (2009). Next generation disparities in human genomics: concerns and remedies. *Trends in Genetics* 25, 489–494.
- [12] Mulder, N., Abimiku, A., Adebamowo, S. N., de Vries, J., Matimba, A., Olowoyo, P., Ramsay, M., Skelton, M., and Stein, D. J. (2018). H3africa: current perspectives. *Pharmacogenomics and Personalized Medicine Volume 11*, 59–66.
- [13] Tucci, S. and Akey, J. M. (2019). The long walk to african genomics. *Genome Biology* 20.
- [14] Campbell, M. C. and Tishkoff, S. A. (2008). African genetic diversity: Implications for human demographic history, modern human origins, and complex disease mapping. *Annual Review of Genomics and Human Genetics* 9, 403–433.
- [15] Li, H. and Durbin, R. (2009). Fast and accurate short read alignment with burrows-wheeler transform. *Bioinformatics* 25, 1754–1760.



- [16] Auwera, G. A., Carneiro, M. O., Hartl, C., Poplin, R., del Angel, G., Levy-Moonshine, A., Jordan, T., Shakir, K., Roazen, D., Thibault, J. *et al.* (2013). From FastQ data to high-confidence variant calls: The genome analysis toolkit best practices pipeline. *Current Protocols in Bioinformatics* 43.
- [17] McKenna, A., Hanna, M., Banks, E., Sivachenko, A., Cibulskis, K., Kernysky, A., Garimella, K., Altshuler, D., Gabriel, S., Daly, M. *et al.* (2010). The genome analysis toolkit: A MapReduce framework for analyzing next-generation DNA sequencing data. *Genome Research* 20, 1297–1303.
- [18] Ross, M. T., Grafham, D. V., Coffey, A. J., Scherer, S., McLay, K., Muzny, D., Platzer, M., Howell, G. R., Burrows, C., Bird, C. P. *et al.* (2005). The DNA sequence of the human x chromosome. *Nature* 434, 325–337.
- [19] Mumm, S., Molini, B., Terrell, J., Srivastava, A., and Schlessinger, D. (1997). Evolutionary features of the 4-mb xq21.3 XY homology region revealed by a map at 60-kb resolution. *Genome Research* 7, 307–314.
- [20] Manichaikul, A., Mychaleckyj, J. C., Rich, S. S., Daly, K., Sale, M., and Chen, W.-M. (2010). Robust relationship inference in genome-wide association studies. *Bioinformatics* 26, 2867–2873.
- [21] Price, A. L., Weale, M. E., Patterson, N., Myers, S. R., Need, A. C., Shianna, K. V., Ge, D., Rotter, J. I., Torres, E., Taylor, K. D. *et al.* (2008). Long-range LD can confound genome scans in admixed populations. *The American Journal of Human Genetics* 83, 132–135.
- [22] Chang, C. C., Chow, C. C., Tellier, L. C., Vattikuti, S., Purcell, S. M., and Lee, J. J. (2015). Second-generation PLINK: rising to the challenge of larger and richer datasets. *GigaScience* 4.
- [23] Abdellaoui, A., Hottenga, J.-J., de Knijff, P., Nivard, M. G., Xiao, X., Scheet, P., Brooks, A., Ehli, E. A., Hu, Y., Davies, G. E. *et al.* (2013). Population structure, migration, and diversifying selection in the netherlands. *European Journal of Human Genetics* 21, 1277–1285.
- [24] Danecek, P., Auton, A., Abecasis, G., Albers, C. A., Banks, E., DePristo, M. A., Handsaker, R. E., Lunter, G., Marth, G. T., Sherry, S. T. *et al.* (2011). The variant call format and VCFtools. *Bioinformatics* 27, 2156–2158.
- [25] Weir, B. S. and Cockerham, C. C. (1984). Estimating f-statistics for the analysis of population structure. *Evolution* 38, 1358.
- [26] Das, S., Forer, L., Schönherr, S., Sidore, C., Locke, A. E., Kwong, A., Vrieze, S. I., Chew, E. Y., Levy, S., McGue, M. *et al.* (2016). Next-generation genotype imputation service and methods. *Nature Genetics* 48, 1284–1287.
- [27] McCarthy, S., Das, S., Kretzschmar, W., Delaneau, O., Wood, A. R., Teumer, A., Kang, H. M., Fuchsberger, C., Danecek, P., Sharp, K. *et al.* (2016). A reference panel of 64,976 haplotypes for genotype imputation. *Nature genetics* 48, 1279–1283.

- [28] Loh, P.-R., Danecek, P., Palamara, P. F., Fuchsberger, C., Reshef, Y. A., Finucane, H. K., Schoenherr, S., Forer, L., McCarthy, S., Abecasis, G. R. *et al.* (2016). Reference-based phasing using the haplotype reference consortium panel. *Nature Genetics* *48*, 1443–1448.
- [29] Durbin, R. (2014). Efficient haplotype matching and storage using the positional burrows-wheeler transform (PBWT). *Bioinformatics* *30*, 1266–1272.
- [30] Kawai, Y., Mimori, T., Kojima, K., Nariyai, N., Danjoh, I., Saito, R., Yasuda, J., Yamamoto, M., and Nagasaki, M. (2015). Japonica array: improved genotype imputation by designing a population-specific SNP array with 1070 japanese individuals. *Journal of Human Genetics* *60*, 581–587.
- [31] Buniello, A., MacArthur, J. A. L., Cerezo, M., Harris, L. W., Hayhurst, J., Malanogone, C., McMahon, A., Morales, J., Mountjoy, E., Sollis, E. *et al.* (2018). The NHGRI-EBI GWAS catalog of published genome-wide association studies, targeted arrays and summary statistics 2019. *Nucleic Acids Research* *47*, D1005–D1012.
- [32] Carvalho-Silva, D., Pierleoni, A., Pignatelli, M., Ong, C., Fumis, L., Karamanis, N., Carmona, M., Faulconbridge, A., Hercules, A., McAuley, E. *et al.* (2018). Open targets platform: new developments and updates two years on. *Nucleic Acids Research* *47*, D1056–D1065.
- [33] Luo, Y., Suliman, S., Asgari, S., Amariuta, T., Baglaenko, Y., Martínez-Bonet, M., Ishigaki, K., Gutierrez-Arcelus, M., Calderon, R., Lecca, L. *et al.* (2019). Early progression to active tuberculosis is a highly heritable trait driven by 3q23 in peruvians. *Nature Communications* *10*.
- [34] Correa-Macedo, W., Cambri, G., and Schurr, E. (2019). The interplay of human and mycobacterium tuberculosis genomic variability. *Frontiers in Genetics* *10*.
- [35] Rolandelli, A., Pellegrini, J. M., Pino, R. E. H. D., Tateosian, N. L., Amiano, N. O., Morelli, M. P., Castello, F. A., Casco, N., Levi, A., Palmero, D. J. *et al.* (2019). The non-synonymous rs763780 single-nucleotide polymorphism in IL17f gene is associated with susceptibility to tuberculosis and advanced disease severity in argentina. *Frontiers in Immunology* *10*.
- [36] Taliun, D., Gamper, J., and Pattaro, C. (2014). Efficient haplotype block recognition of very long and dense genetic sequences. *BMC bioinformatics* *15*, 10.
- [37] Weissensteiner, H., Pacher, D., Kloss-Brandstätter, A., Forer, L., Specht, G., Bandelt, H.-J., Kronenberg, F., Salas, A., and Schönherr, S. (2016). HaploGrep 2: mitochondrial haplogroup classification in the era of high-throughput sequencing. *Nucleic Acids Research* *44*, W58–W63.
- [38] Poznik, G. D. (2016). Identifying y-chromosome haplogroups in arbitrarily large samples of sequenced or genotyped men. *bioRxiv* *1*.
- [39] van Oven, M. and Kayser, M. (2009). Updated comprehensive phylogenetic tree of global human mitochondrial dna variation. *Human Mutation* *30*, E386–E394.

- [40] van Oven, M., Van Geystelen, A., Kayser, M., Decorte, R., and Larmuseau, M. H. (2014). Seeing the wood for the trees: A minimal reference phylogeny for the human y chromosome. *Human Mutation* *35*, 187–191.
- [41] Rishishwar, L. and Jordan, I. K. (2017). Implications of human evolution and admixture for mitochondrial replacement therapy. *BMC Genomics* *18*.
- [42] Jobling, M. A. and Tyler-Smith, C. (2017). Human y-chromosome variation in the genome-sequencing era. *Nature Reviews Genetics* *18*, 485–497.
- [43] Fuchsberger, C., Flannick, J., Teslovich, T. M., Mahajan, A., Agarwala, V., Gaulton, K. J., Ma, C., Fontanillas, P., Moutsianas, L., McCarthy, D. J. *et al.* (2016). The genetic architecture of type 2 diabetes. *Nature* *536*, 41–47.
- [44] Steinthorsdottir, V., Thorleifsson, G., Sulem, P., Helgason, H., Grarup, N., Sigurdsson, A., Helgadóttir, H. T., Johannsdóttir, H., Magnusson, O. T., Gudjonsson, S. A. *et al.* (2014). Identification of low-frequency and rare sequence variants associated with elevated or reduced risk of type 2 diabetes. *Nature Genetics* *46*, 294–298.
- [45] Quick, C., Anugu, P., Musani, S., Weiss, S. T., Burchard, E. G., White, M. J., Keys, K. L., Cucca, F., Sidore, C., Boehnke, M. *et al.* (2020). Sequencing and imputation in GWAS: Cost-effective strategies to increase power and genomic coverage across diverse populations. *Genetic Epidemiology* *44*, 537–549.
- [46] Rosenberg, N. A., Li, L. M., Ward, R., and Pritchard, J. K. (2003). Informativeness of genetic markers for inference of ancestry. *The American Journal of Human Genetics* *73*, 1402–1422.
- [47] Shriver, M. D., Parra, E. J., Dios, S., Bonilla, C., Norton, H., Jovel, C., Pfaff, C., Jones, C., Massac, A., Cameron, N. *et al.* (2003). Skin pigmentation, biogeographical ancestry and admixture mapping. *Human Genetics* *112*, 387–399.

## Tables and Figures

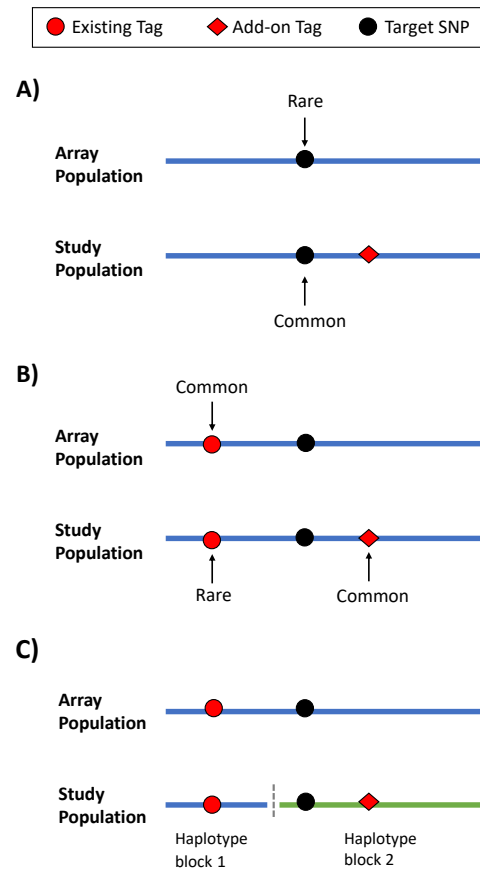

Figure 1: Scenarios under which add-on tags could improve genotype imputation. Array population represents the population that the existing genotyping array is designed for. Study population represents the population that the add-on tags are designed for. **A)** A target SNP that is rare in the array population, and was thus not designed to be tagged by any existing tag SNPs. However, it is common in the study population, which justifies the use of an add-on tag. **B)** An existing tag SNP that is common in the design population but rare in the study population, thus reducing its tagging efficiency in the study population. **C)** The presence of population-specific haplotype structures in the study population, where the target SNP is no longer on the same haplotype block and no longer in strong LD with the existing tag SNP.

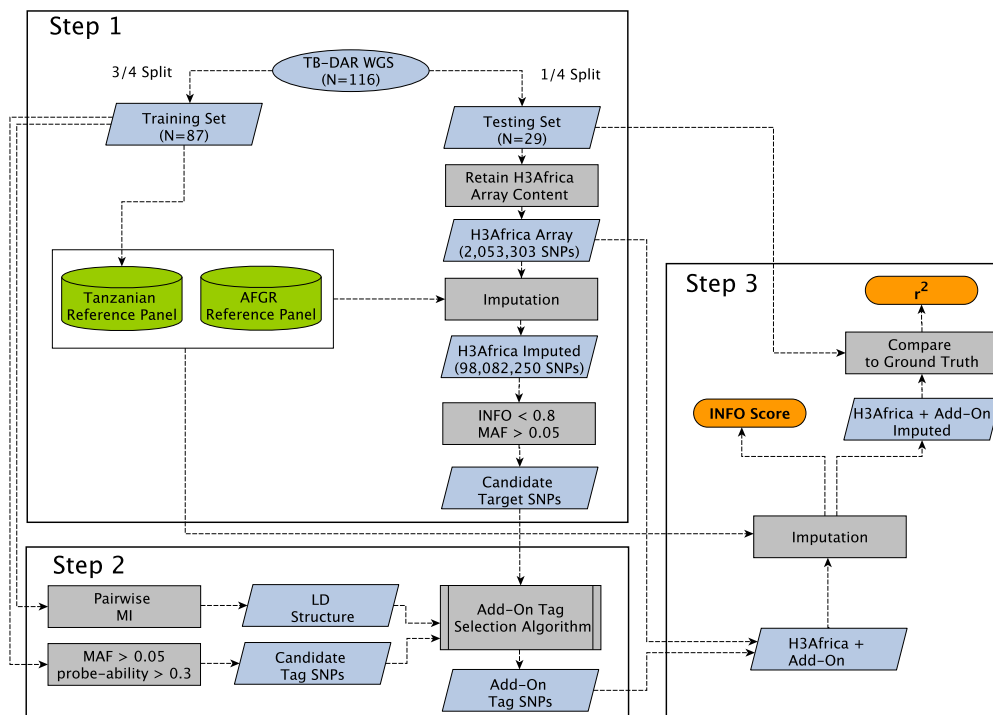

Figure 2: Schematic of our add-on tag SNP selection procedures, with steps illustrating: **Step 1)** Constructing a Tanzanian reference panel. Identifying candidate target SNPs, which are derived from poorly imputed SNPs when the H3Africa array is imputed based on the Tanzanian and AFGR reference panel. **Step 2)** Selecting add-on tag SNPs that optimally tag candidate target SNPs based on population-specific LD structures, allele frequencies, and probe qualities. **Step 3)** Evaluating improvements in imputation performance after adding add-on tag SNPs to the base H3Africa array. Calculating imputation quality metrics, including INFO score and  $r^2$  (correlation between imputed and sequencing-based genotypes).

WGS, Whole-Genome Sequencing; AFGR, African Genome Resource; MAF, Minor Allele Frequency; MI, Mutual Information; LD, Linkage Disequilibrium.

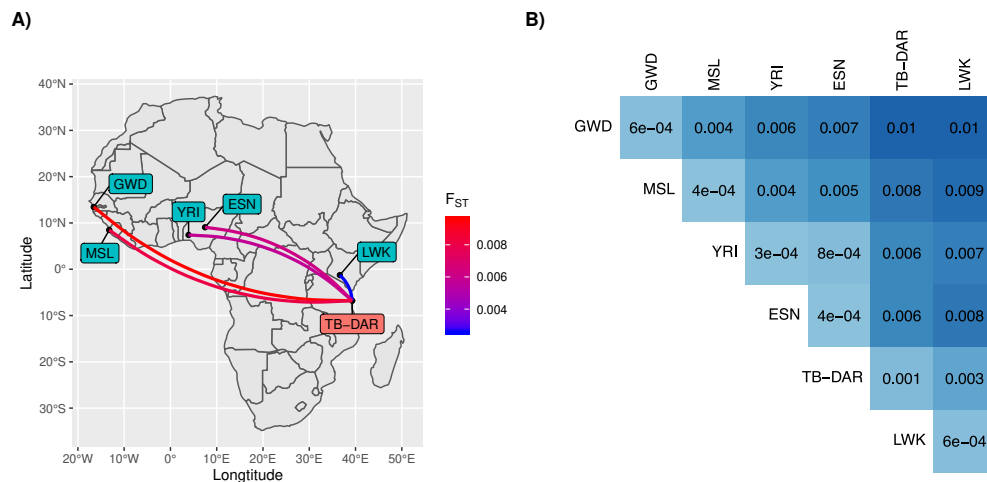

Figure 3: Genetic differentiation of African populations **A)** Sampling locations of 1000 Genomes African populations and the TB-DAR WGS cohort. Line colors illustrate the degree of differentiation ( $F_{ST}$ ) between TB-DAR and 1000 Genomes populations. **B)** Pairwise  $F_{ST}$  measures between 1000 Genomes African population and TB-DAR. Diagonals of the matrix represent differentiation within a population, calculated between two halves of the population defined based on the median of the top genetic principal component.

1000 Genome Populations: GWD - Gambian in Western Divisions in the Gambia; MSL - Mende in Sierra Leone; YRI - Yoruba in Ibadan, Nigeria; ESN - Esan in Nigeria; LWK - Luhya in Webuye, Kenya.

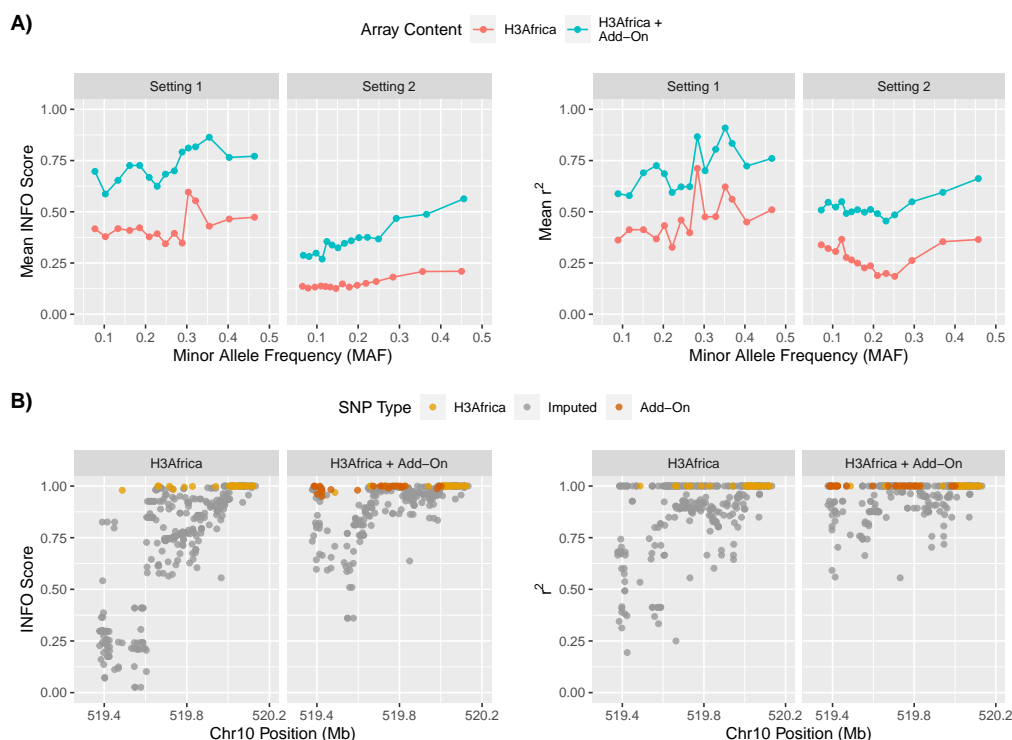

Figure 4: Improvement in imputation performance subsequent to the addition of add-on tag SNPs. **A)** Mean INFO score and  $r^2$  (between imputed and sequenced ground truth) of target SNPs designed to be tagged by add-on SNPs, prior and subsequent to the incorporation of add-on SNPs. Facet grids illustrate results based on two tag SNP selection settings: coverage guaranteeing within prioritized regions (Setting 1) and efficiency driven in all other regions (Setting 2). **B)** Example region on chromosome 10 where the incorporation of add-on tag SNPs lead to the increase in imputation performance. Facet grids illustrate imputation performance prior and subsequent to the incorporation of add-on tags. Color of dots represent type of SNP (existing H3Africa tags, add-on tags, or any other imputed SNPs).

Table 1: Efficiencies of add-on tag SNPs, categorized based on source reference panel and selection settings. Imputation improvements categorized as any increase in INFO score, or any increase that resulted in INFO score exceeding 0.8 when previously under 0.8.

| Reference Panel                                                | Tags Added | INFO Score Improvement | INFO Score > 0.8 |
|----------------------------------------------------------------|------------|------------------------|------------------|
| <b>Prioritized Regions (Setting 1) - Coverage Guaranteeing</b> |            |                        |                  |
| All                                                            | 1669       | 52,798                 | 10,349           |
| Tanzanian                                                      | 666        | 33,516                 | 2881             |
| African Genome Resource (AFGR)                                 | 1003       | 20,010                 | 6753             |
| <b>Other Regions (Setting 2) - Efficiency Driven</b>           |            |                        |                  |
| All                                                            | 2734       | 26,3192                | 38,336           |
| Tanzanian                                                      | 1417       | 16,7040                | 8749             |
| African Genome Resource (AFGR)                                 | 1317       | 95,892                 | 26,564           |
